# Supplementary material for: A simple, efficient, and rapid method for dye removal from wastewater using an IDA-GO@Fe3O4 magnetic nanocomposite
Source: Royal Society of Chemistry journal article supplement (doi:10.1039/d4ra04555f), 2024-01-01
Supplement: d4ra04555f1.pdf [file d4ra04555f1.pdf]

## A simple, Efficient, and Rapid Method for Dyes removal from Wastewater using IDA-GO@Fe<sub>3</sub>O<sub>4</sub> Magnetic Nanocomposite

Amir Abdolmaleki,<sup>\*a</sup> Zahra Mohamadi<sup>b</sup> and Zahra Bazyar<sup>c</sup>

<sup>a</sup> Department of Chemistry, College of Sciences, Shiraz University, Shiraz 71467-13565, I. R. Iran

<sup>b</sup> Department of Chemistry, Isfahan University of Technology, Isfahan 84156-83111, I. R. Iran

<sup>c</sup> Department of Chemistry, Behbahan Khatam Alanbia University of Technology, Behbahan, 63616-63973, I. R. Iran

\*Corresponding author. E-mails : [abdolmaleki@shirazu.ac.ir](mailto:abdolmaleki@shirazu.ac.ir), [abdolmaleki@iut.ac.ir](mailto:abdolmaleki@iut.ac.ir); Tel: +98-71-3613-7187; Fax: +98-71-3613-7310.

FTIR spectroscopy of GO, EDA-GO, and IDA-GO were reported by our group previously.<sup>1</sup> Briefly, the broad band at approximately 3320 cm<sup>-1</sup> (the O-H stretching vibration), the band at around 1732 cm<sup>-1</sup> (stretching vibration of the C=O bond of Carboxylic acid groups), and bands at 1224, and 1066 cm<sup>-1</sup> (stretching of C-OH, and of C-O bond, respectively) confirms the GO synthesis. After modification with EDA, a new band at 1656 cm<sup>-1</sup> (C=O bond of amide groups and additional bands attributed to the asymmetric stretching vibrations of C-N bonds, as well as the out-of-plane vibrations of NH<sub>2</sub> and NH, and the stretching vibrations of N-H confirms the structure. In the IDA-GO spectrum, a prominent band at 1743 cm<sup>-1</sup> indicates the presence of carboxylic acid groups. The absence of the 1547 cm<sup>-1</sup> band confirms the successful covalent bonding of acetic acid groups to EDA-GO and the transformation of primary amine groups into tertiary ones.

Also, EDA-GO and IDA-GO Raman spectra upon functionalizing graphene oxide with ethylenediamine (EDA-GO), the D and G peaks are observed at 1349 and 1584 cm<sup>-1</sup>, respectively. The D/G ratio increases to 1.06, indicating the incorporation of *sp*<sup>3</sup> hybridized carbon species onto the graphene oxide sheets. The D/G ratio for IDA-GO is 1.05, with D and G peaks at 1344 and 1576 cm<sup>-1</sup>, respectively. This suggests suitable oxidation and successful functionalization of graphene oxide.<sup>1</sup>

TGA analysis was reported in our previous report.<sup>1</sup> Briefly, the GO thermogram displays two distinct stages of weight loss, the first stage, corresponds to the degradation of CO<sub>2</sub>-containing groups. The second stage, is attributed to the pyrolysis of the carbonaceous framework. In the EDA-GO thermogram, weight reduction begins at 200 °C and continues up to 800 °C. This gradual weight loss indicates an increase in hydrogen bonding between the functional groups in G-NH<sub>2</sub> compared to GO, due to the functionalization of graphene oxide sheets. Consequently, the remaining weight of EDA-GO is higher than that of GO. The IDA-GO thermogram demonstrates the pyrolysis of ethylenediamine and carboxylic acid groups at temperatures between 210 and 340 °C. Additionally, weight loss occurs between 340 and 450 °C due to the decomposition of the carbonaceous framework and the removal of organic groups from the IDA-GO surface.<sup>1</sup>

**Table S1** Thermodynamic parameters for MB and MO absorbed by IDA-GO/Fe<sub>3</sub>O<sub>4</sub>

|           | Freundlich |                      |                       | Langmuir                    |                       |                       |
|-----------|------------|----------------------|-----------------------|-----------------------------|-----------------------|-----------------------|
|           | <i>n</i>   | <i>K<sub>f</sub></i> | <i>R</i> <sup>2</sup> | <i>K<sub>L</sub></i> (l/mg) | <i>R<sub>L</sub></i>  | <i>R</i> <sup>2</sup> |
| <b>MB</b> | 9.40       | 260.20               | 0.7318                | 8.00                        | 4.40×10 <sup>-4</sup> | 0.99                  |
|           |            |                      |                       |                             |                       | 60                    |
| <b>MO</b> | 3.40       | 45.80                | 0.8973                | 0.30                        | 2.50×10 <sup>-2</sup> | 0.99                  |
|           |            |                      |                       |                             |                       | 44                    |

**Table S2** Pseudofirst-order and pseudosecond-order kinetic parameters

|           | Pseudo-first-order model            |                                     | Pseudo- second -order model |                       |                                     |                                     |                      |                       |
|-----------|-------------------------------------|-------------------------------------|-----------------------------|-----------------------|-------------------------------------|-------------------------------------|----------------------|-----------------------|
|           | <i>q<sub>e</sub></i> ( <i>exp</i> ) | <i>q<sub>e</sub></i> ( <i>cal</i> ) | <i>K<sub>1</sub></i>        | <i>R</i> <sup>2</sup> | <i>q<sub>e</sub></i> ( <i>exp</i> ) | <i>q<sub>e</sub></i> ( <i>cal</i> ) | <i>K<sub>2</sub></i> | <i>R</i> <sup>2</sup> |
| <b>MB</b> | 200.00                              | 35.40                               | 1.60×10 <sup>-2</sup>       | 0.9399                | 200.00                              | 200.00                              | 9.8×10 <sup>-4</sup> | 0.9999                |
| <b>MO</b> | 98.00                               | 67.10                               | 1.50×10 <sup>-2</sup>       | 0.8834                | 98.00                               | 105.20                              | 3.6×10 <sup>-4</sup> | 0.9984                |

## Reference

1 A. abdolmaleki, z. mohamadi, H. Fashandi, Z. Bazyar, Chemical Engineering Journal, 2024,**481**, 148622.
